# Supplementary material for: A guanidine-rich regulatory oligodeoxynucleotide improves type-2 diabetes in obese mice by blocking T-cell differentiation
Source: PubMed Central journal article supplement (PMC3491840; doi:10.1002/emmm.201201272), 2012-10-02
Supplement: emmm0004-1112-SD2.pdf [file emmm0004-1112-SD2.pdf]

**TABLE OF CONTENTS:**

|                               |       |               |
|-------------------------------|-------|---------------|
| <b>Table of contents</b>      | ----- | <b>Page 1</b> |
| <b>Supplementary Figure 1</b> | ----- | <b>Page 2</b> |
| <b>Supplementary Figure 2</b> | ----- | <b>Page 3</b> |
| <b>Supplementary Figure 3</b> | ----- | <b>Page 4</b> |
| <b>Supplementary Figure 4</b> | ----- | <b>Page 5</b> |
| <b>Supplementary Figure 5</b> | ----- | <b>Page 5</b> |
| <b>Supplementary Figure 6</b> | ----- | <b>Page 6</b> |
| <b>Supplementary Figure 7</b> | ----- | <b>Page 6</b> |
| <b>Supplementary Figure 8</b> | ----- | <b>Page 7</b> |
| <b>Supplementary Figure 9</b> | ----- | <b>Page 8</b> |

## SUPPLEMENTARY MATERIALS

### A guanidine-rich regulatory oligodeoxynucleotide improves type-2 diabetes in obese mice by blocking T-cell differentiation

Xiang Cheng, Jing Wang, Ni Xia, Xin-Xin Yan, Ting-Ting Tang, Han Chen, Hong-Jian Zhang, Juan Liu, Wen Kong, Sara Sjöberg, Eduardo Folco, Peter Libby, Yu-Hua Liao, Guo-Ping Shi

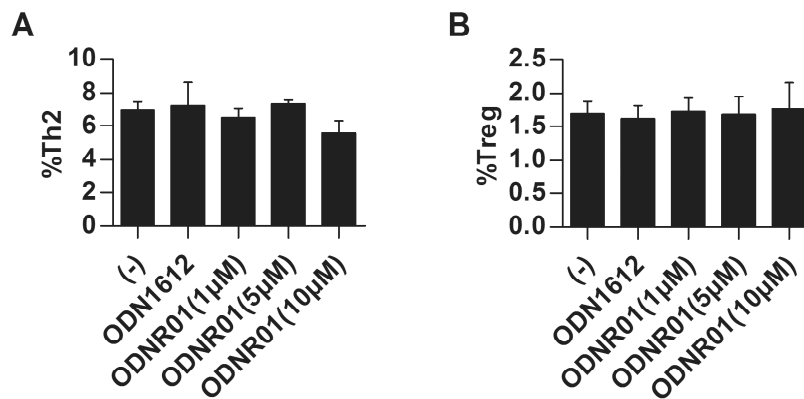

**Supplementary Figure 1.** Th2 (A) or Treg (B) cell frequencies in CD4<sup>+</sup> T cells after cells were treated with 5 μM ODN1612 or different amounts of ODNR01, as indicated, for 4 days. There were no significant differences among these treatments. Data are representative of three independent experiments.

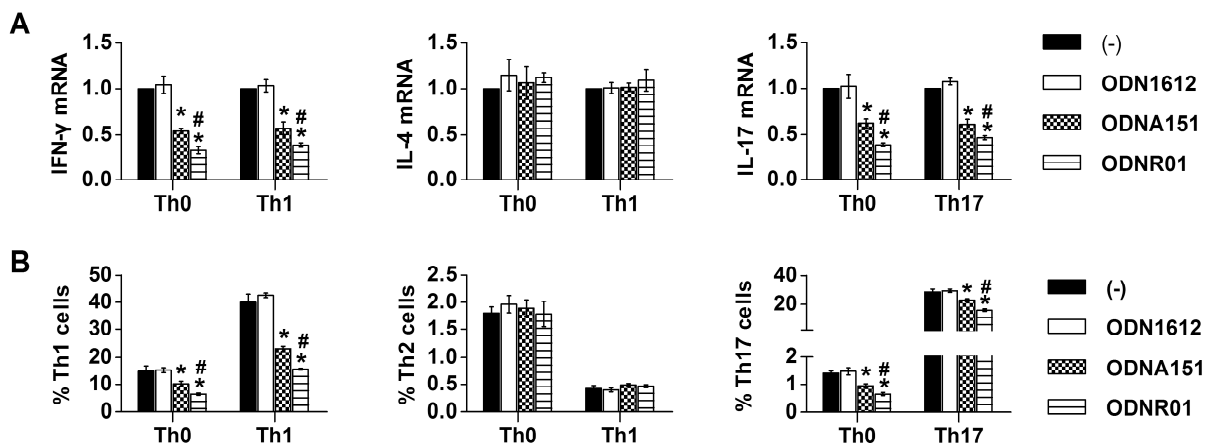

**Supplementary Figure 2.** Immunosuppressive activity of ODNR01 on Th1 and Th17 cell differentiation from Th1-biased C57BL/6 mice. **A.** CD4<sup>+</sup> T cells were treated with anti-CD3 and anti-CD28 mAb with or without (-) 5  $\mu$ M different ODNs under Th0, Th1, or Th17 conditions for 3 days. IFN- $\gamma$ , IL-4, and IL-17 mRNA levels were determined by RT-PCR. Immunosuppressive ODNA151 was used as a positive control, and random ODN1612 was used as a negative control. **B.** Th1, Th2, or Th17 cell frequencies in CD4<sup>+</sup> T cells after cells were treated with ODNs as in **A** for 4 days. Data represent three independent experiments. \* $P$ <0.05 vs. (-) and ODN1612; # $P$ <0.05 vs. ODNA151.

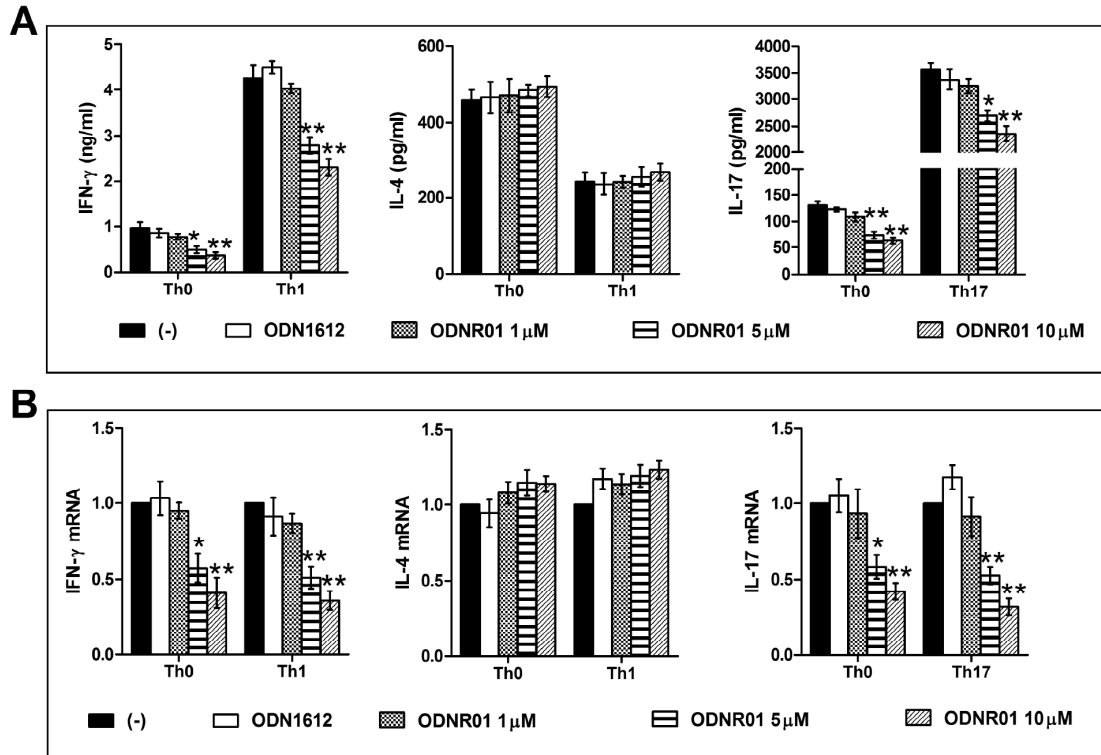

**Supplementary Figure 3.** Immunosuppressive activity of ODNR01 on Th1 and Th17 cell differentiation from Th2-biased Balb/c mice. **A.** CD4<sup>+</sup> T-cell culture media IFN- $\gamma$ , IL-4, and IL-17 levels, as determined by ELISA. Splenic CD4<sup>+</sup> T cells from Balb/c mice were treated with anti-CD3 and anti-CD28 mAb with or without (-) ODN1612 (5  $\mu$ M) or different doses of ODNR01 (1, 5, 10  $\mu$ M) under Th0, Th1, or Th17 conditions. **B.** RT-PCR determined CD4<sup>+</sup> T-cell IFN- $\gamma$ , IL-4, and IL-17 mRNA levels after cells were treated as in **A.** Data represent three independent experiments. \* $P$ <0.05, \*\* $P$ <0.01 vs. (-) and ODN1612.

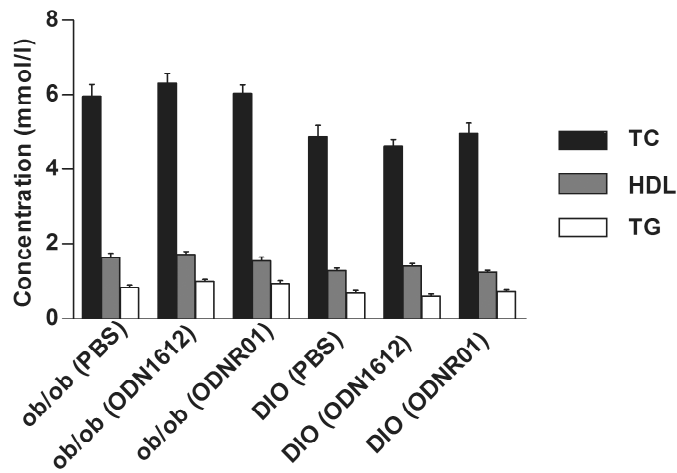

**Supplementary Figure 4.** ELISA determined mouse plasma total cholesterol (TC), high-density lipoprotein (HDL), and triglyceride (TG) levels in *ob/ob* mice (on a normal chow diet, NCD) and DIO mice (on a high-fat diet, HFD) receiving PBS, ODN1612, and ODNR01. There were no significant differences among the treatments. n=7~8 mice per group.

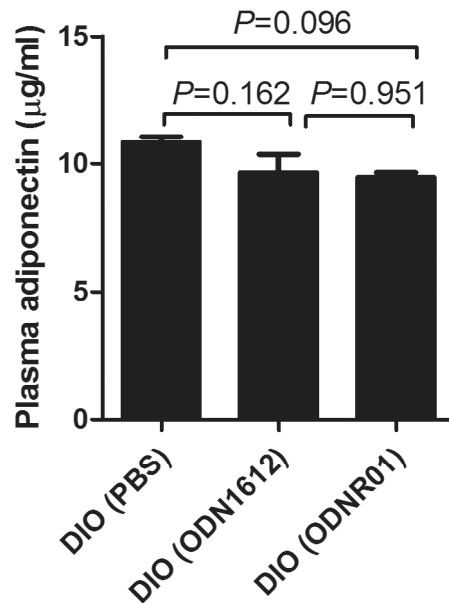

**Supplementary Figure 5.** ELISA determined mouse plasma adiponectin levels in DIO mice (on a high-fat diet, HFD) receiving PBS, ODN1612, and ODNR01. There were no significant differences among the treatments. n=7~8 mice per group.

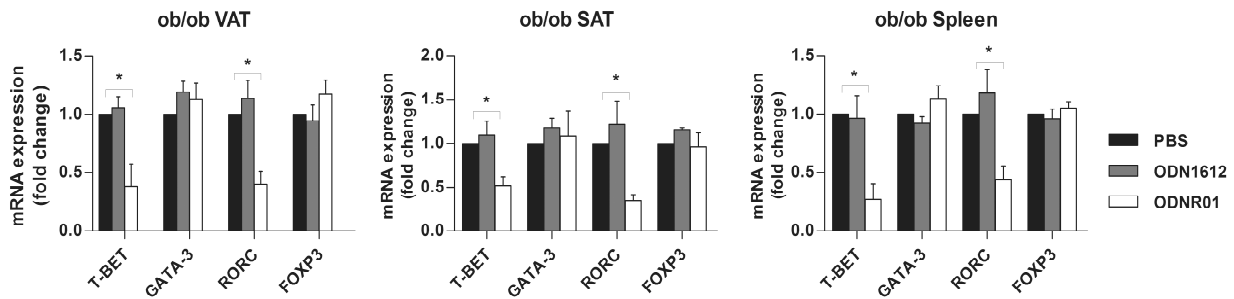

**Supplementary Figure 6.** RT-PCR determined mRNA levels of transcription regulators (T-bet, GATA-3, ROR $\gamma$ t, and Foxp3) in sorted CD4<sup>+</sup> T cells from VAT, SAT, and spleen of *ob/ob* mice treated with different ODNs. \* $P < 0.05$ ,  $n = 6 \sim 8$  mice per group.

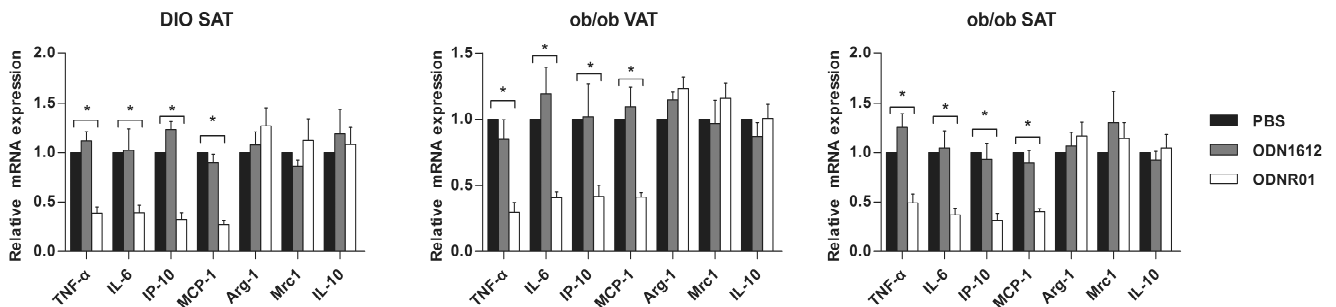

**Supplementary Figure 7.** RT-PCR determined mRNA levels of M1 markers (TNF- $\alpha$ , IL-6, IP-10, and MCP-1) and M2 markers (Arg1, Mrc1, and IL-10) in SAT from DIO mice and in VAT and SAT from *ob/ob* mice after normalizing to GAPDH. Fold change was calculated relative to PBS group. \* $P < 0.05$ ;  $n = 6$  mice per group.

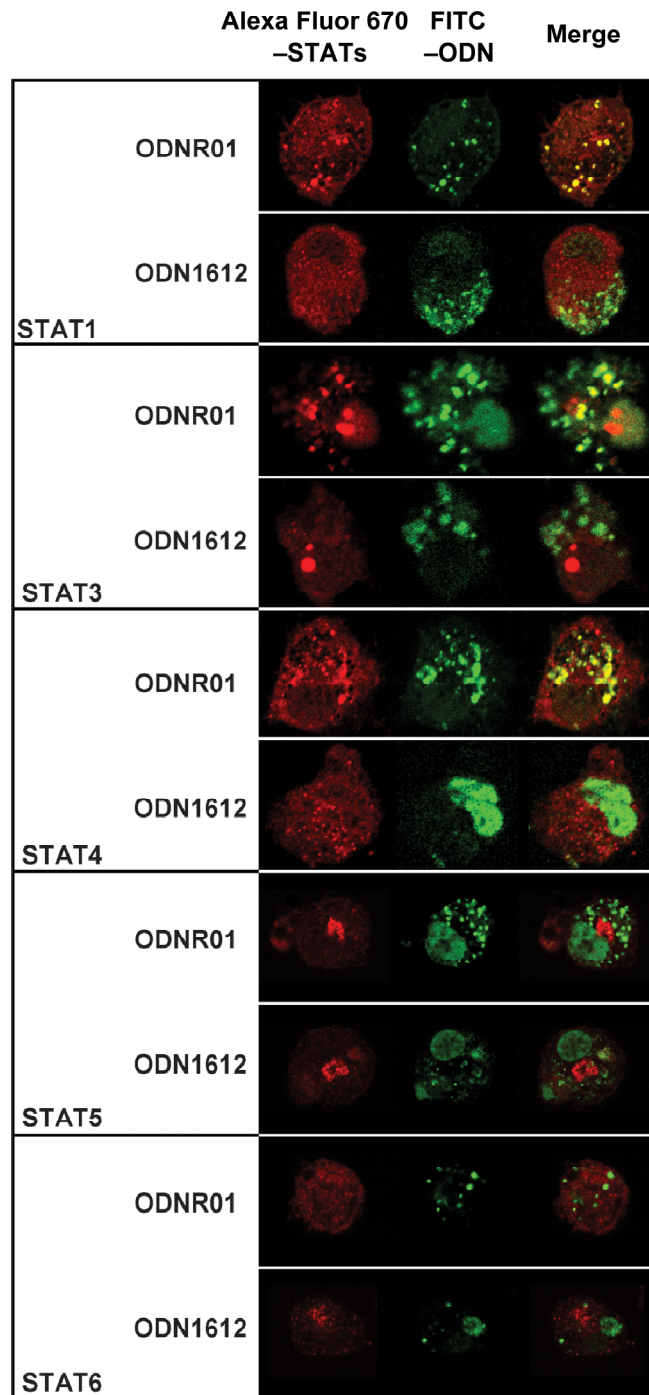

**Supplementary Figure 8.** Confocal microscopy to detect co-localization of FITC-conjugated ODNs (2.5  $\mu$ M) (green) with different Alexa Fluor 670-conjugated anti-STAT rabbit polyclonal antibodies (red) in mouse bone marrow-derived macrophages after 24 hours of incubation.

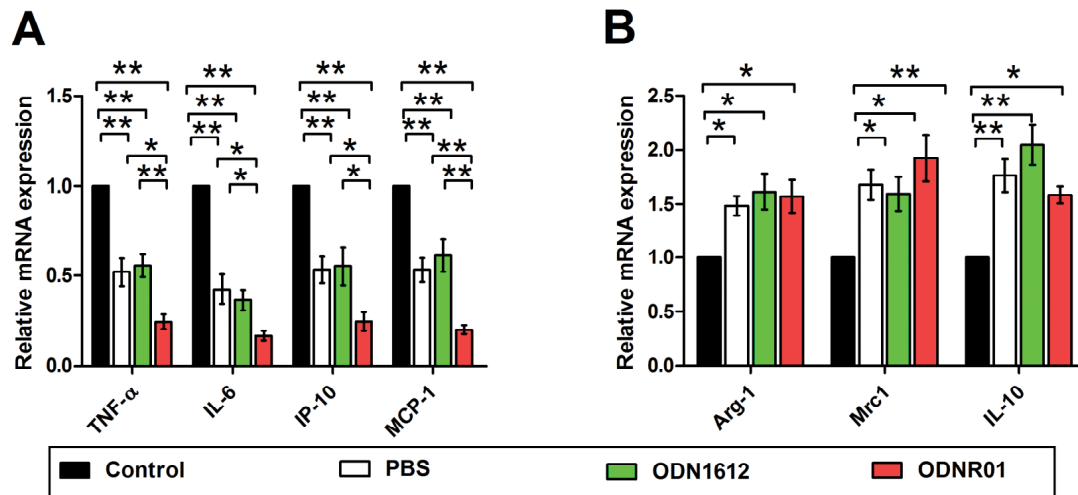

**Supplementary Figure 9.** RT-PCR determined mRNA levels of M1 markers (TNF- $\alpha$ , IL-6, IP-10, and MCP-1) (**A**) and M2 markers (Arg1, Mrc1, and IL-10) (**B**) in VAT after normalizing to GAPDH. Fold change was calculated relative to control group. Control: no reconstitution or treatment, but HFD for the same time period; PBS: CD4<sup>+</sup> T-cell-reconstituted mice were treated with PBS or mice reconstituted with PBS-treated CD4<sup>+</sup> T cells. \* $P$ <0.05, \*\* $P$ <0.01,  $n$ =6~8 mice per group.
